# Supplementary material
Source: PubMed Central journal article supplement (PMC2585021)
Supplement: 90248.2008_3.pdf [file 90248.2008_3.pdf]

**Supplementary Table 2 - Properties of modules created after different iterations**

| Iterations                       |                 | 1        | 2        | 3        | 4        |
|----------------------------------|-----------------|----------|----------|----------|----------|
| Modules                          |                 | 1430     | 884      | 742      | 724      |
| % Overlap                        |                 |          |          |          |          |
| P-value                          | Mean            | 0.000143 | 0.00011  | 0.000101 | 0.000116 |
|                                  | Median          | 9.3E-07  | 1.39E-06 | 1.04E-06 | 1.6E-06  |
|                                  | Min             | 0        | 3.5E-286 | 3.6E-197 | 4.1E-158 |
|                                  | Max             | 0.00171  | 0.00121  | 0.00115  | 0.00126  |
|                                  | 25th percentile | 2.26E-10 | 1.19E-09 | 6.39E-10 | 1.4E-09  |
| Gene Sets                        |                 | 10978    | 10978    | 10978    | 10978    |
| Enriched Sets                    |                 | 6633     | 5763     | 5339     | 5461     |
| Enrichments (Gene Sets)          |                 | 466489   | 203102   | 147833   | 173981   |
| Modules Enriched with Gene Sets  |                 | 1430     | 884      | 689      | 723      |
| Enrichments/Modules              | Mean            | 326.2168 | 229.7545 | 214.2522 | 240.3052 |
|                                  | Median          | 162      | 92       | 65.5     | 81       |
|                                  | Min             | 1        | 1        | 1        | 1        |
|                                  | Max             | 2855     | 2352     | 2264     | 2142     |
|                                  |                 |          |          |          |          |
| Sample attributes                |                 | 364      | 364      | 364      | 364      |
| Enriched Attributes              |                 | 182      | 153      | 134      | 135      |
| Enrichments (Attributes)         |                 | 6959     | 2453     | 1535     | 1457     |
| Modules Enriched with Attributes |                 | 1090     | 523      | 413      | 405      |
| Attributes/Modules               | Mean            | 6.385321 | 4.683206 | 3.710145 | 3.591133 |
|                                  | Median          | 6        | 4        | 3        | 3        |
|                                  | Min             | 1        | 1        | 1        | 1        |
|                                  | Max             | 19       | 17       | 16       | 14       |
|                                  |                 |          |          |          |          |
| Attribute Pvalue                 | Mean            | 0.000152 | 9.9E-05  | 7.5E-05  | 7.34E-05 |
|                                  | Median          | 5.59E-05 | 3.85E-05 | 3.46E-05 | 3.48E-05 |
|                                  | Min             | 5.9E-21  | 3.32E-19 | 9.23E-17 | 2.93E-19 |
|                                  | Max             | 0.000775 | 0.000488 | 0.000356 | 0.00034  |
|                                  |                 |          |          |          |          |
